# Supplementary material for: Sensitive and selective detection of microRNA in complex biological samples based on protein-enhanced fluorescence anisotropy
Source: Royal Society of Chemistry journal article supplement (doi:10.1039/c9ay02024a), 2020-01-01
Supplement: c9ay02024a1.pdf [file c9ay02024a1.pdf]

## Electronic Supplementary Material

# **Sensitive and selective detection of microRNA in complex biological samples based on protein-enhanced fluorescence anisotropy**

Yan Li<sup>a</sup>, Yao Sun<sup>b</sup>, Jieyun Ye<sup>c</sup>, Fengping Pan<sup>a</sup>, Bo Peng<sup>a</sup>, Haiqiang Li<sup>a</sup>, Mingming Zhang<sup>a</sup>, Yan Xu<sup>d\*</sup>

<sup>a</sup>Department of Anorectal Surgery, Affiliated Hospital of Jiaying University (The First Hospital of Jiaying)

<sup>b</sup>Department of Emergency Surgery, Affiliated Hospital of Jiaying University (The First Hospital of Jiaying)

<sup>c</sup>Tongji Zhejiang College

<sup>d</sup>Department of E.N.T, Affiliated Hospital of Jiaying University (The First Hospital of Jiaying)

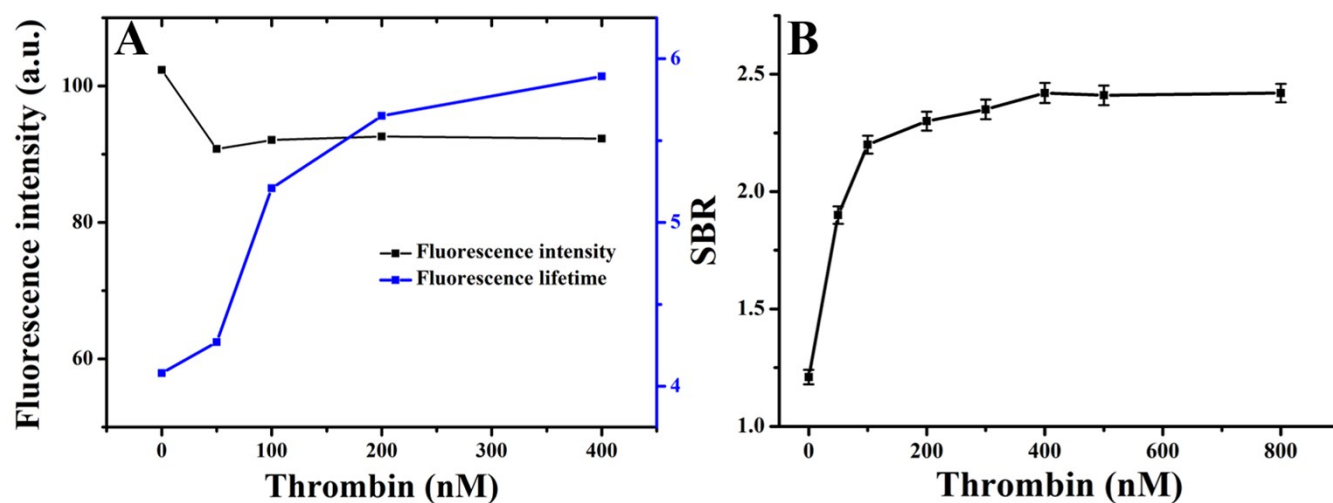

**Fig. S1** (A) Fluorescence intensity (black line) and lifetime (blue line) change of 100 nM FA probe after addition different concentrations of thrombin. (B) Optimization of the thrombin concentration.

**Table S1** miRNA was measured in BSA by using the presented FAS.

| sample | Added (pM) | Founded (nM) | Recovery (%) |
|--------|------------|--------------|--------------|
| 1      | 50         | 52.8         | 105.6        |
| 2      | 100        | 104.3        | 104.3        |
| 3      | 500        | 486          | 97.2         |
| 4      | 1000       | 1068.8       | 106.9        |
| 5      | 5000       | 4891.6       | 97.8         |
